# Supplementary material for: Use of Maternal GHb Concentration to Estimate the Risk of Congenital Anomalies in the Offspring of Women with Prepregnancy Diabetes
Source: Oxford University Press journal article supplement (doi:10.2337/dc07-0278), 2007-06-27
Supplement: dc070278-sup-appendices_278.doc [file dc070278-sup-appendices_278.doc]

**Appendix 1**

The logistic-normal model can be written as:

logit (pij) = log e [pij /(1- pij)] = γ00 + γ10* GHbSDij + u0j

Where pij is the proportion of anomalies among the *i-th* category of GHbSD in study *j*. The error term, u0j, represents the random effect of study *j*, and follows a normal distribution with a mean of zero and constant variance. Predicted logit values are transformed back to the proportions scale using the formula e logit /(1 + e logit ).

The SAS coding for fitting the logistic-normal model used herein were as follows:

**PROC** **NLMIXED** cov corr;

PARMS gamma00=**1** gamma10=-**2** vc=**1**;

BOUNDS vc >= **0**;

eta = gamma00+ gamma10*GHbSD + u;

expeta = exp(eta);

p = expeta/(**1**+expeta);

MODEL no_cm ~ binomial(no_births,p);

RANDOM u ~ normal(**0**,vc) subject=study;

PREDICT p OUT=p1;

ESTIMATE 'Proportion for GHB_SD=0' exp(beta0+**0***beta1)/(**1**+exp(beta0+**0***beta1));

ESTIMATE 'Proportion for GHB_SD=1' exp(beta0+**1***beta1)/(**1**+exp(beta0+**1***beta1));

ESTIMATE 'Proportion for GHB_SD=2' exp(beta0+**2***beta1)/(**1**+exp(beta0+**2***beta1));

ESTIMATE 'Proportion for GHB_SD=3' exp(beta0+**3***beta1)/(**1**+exp(beta0+**3***beta1));

ESTIMATE 'Proportion for GHB_SD=4' exp(beta0+**4***beta1)/(**1**+exp(beta0+**4***beta1));

ESTIMATE 'Proportion for GHB_SD=5' exp(beta0+**5***beta1)/(**1**+exp(beta0+**5***beta1));

ESTIMATE 'Proportion for GHB_SD=6' exp(beta0+**6***beta1)/(**1**+exp(beta0+**6***beta1));

ESTIMATE 'Proportion for GHB_SD=7' exp(beta0+**7***beta1)/(**1**+exp(beta0+**7***beta1));

ESTIMATE 'Proportion for GHB_SD=8' exp(beta0+**8***beta1)/(**1**+exp(beta0+**8***beta1));

ESTIMATE 'Proportion for GHB_SD=9' exp(beta0+**9***beta1)/(**1**+exp(beta0+**9***beta1));

ESTIMATE 'Proportion for GHB_SD=10' exp(beta0+**10***beta1)/(**1**+exp(beta0+**10***beta1));

ESTIMATE 'Proportion for GHB_SD=11' exp(beta0+**11***beta1)/(**1**+exp(beta0+**11***beta1));

ESTIMATE 'Proportion for GHB_SD=12' exp(beta0+**12***beta1)/(**1**+exp(beta0+**12***beta1));

**RUN**;

**Appendix 2. Derived absolute risk of a major or minor congenital anomaly in association with the number of standard deviations of glycosylated hemoglobin (GHbSD) above normal, and the approximate corresponding HbA1c concentration, measured periconceptionally**

| **GHbSD** | **Corresponding**  **HbA1c (%)*** | **Absolute risk of a congenital anomaly (%, 95% confidence interval)** |
| --- | --- | --- |
| 0 | 5.5 | 2.2 (0.0-4.4) |
| 1 | 6.2 | 2.7 (0.2-5.2) |
| 2 | 6.9 | 3.2 (0.4-6.1) |
| 3 | 7.6 | 3.9 (0.7-7.2) |
| 4 | 8.3 | 4.8 (1.0-8.6) |
| 5 | 9.0 | 5.8 (1.3-10.2) |
| 6 | 9.7 | 7.0 (1.7-12.3) |
| 7 | 10.4 | 8.4 (2.0-14.8) |
| 8 | 11.1 | 10.1 (2.3-17.8) |
| 9 | 11.8 | 12.1 (2.6-21.5) |
| 10 | 12.5 | 14.4 (2.8-25.9) |
| 11 | 13.2 | 17.0 (2.9-31.1) |
| ≥ 12** | ≥ 13.9 | 20.1 (3.0-37.1) |

*Assumes a mean (SD) HbA1c assay reference value of 5.5% (0.7%) among non-diabetic, non-pregnant controls.

**Values of GHbSD greater than 12 were truncated to a value of 12 in the analysis.
